# Supplementary material for: Psychosocial Profiles of Family Caregivers for Colorectal Cancer Patients with Permanent Ostomies: A Latent Class Analysis of Resilience, Depression, and Self-Efficacy
Source: Research Square preprint supplement (doi:10.21203/rs.3.rs-7574295/v1), 2025-11-04
Supplement: Supplementary file 1 [file 989725f015d1e38336b6e020.docx]

**Table 1**  Latent Class Model Fit Comparison.

| **Classes (K)** | **Free Parameters** | **Log Likelihood** | **AIC** | **BIC** | **aBIC** | **Entropy** | **LMR p-value** | **BLRT p-value** |
| --- | --- | --- | --- | --- | --- | --- | --- | --- |
| 1 | 13 | -5194.12 | 10414.24 | 10447.86 | 10426.12 | — | — | — |
| 2 | 20 | -5141.50 | 10323.00 | 10380.24 | 10344.32 | 0.601 | 0.011 | <.001 |
| 3 | 27 | -5104.44 | 10262.88 | 10344.73 | 10294.64 | 0.621 | 0.057 | <.001 |
| **4** | **34** | **-5085.97** | **10259.94** | **10297.37** | **10268.28** | **0.631** | **0.037** | **<.001** |
| 5 | 41 | -5074.08 | 10230.16 | 10302.20 | 10266.41 | 0.597 | 0.268 | <.001 |
| 6 | 48 | -5067.65 | 10231.29 | 10337.96 | 10299.59 | 0.590 | 0.465 | <.001 |

**Note:** Model selection indices for 1- to 6-class latent class models are presented. AIC = Akaike Information Criterion; BIC = Bayesian Information Criterion; aBIC = sample-size adjusted BIC. Entropy indicates classification accuracy, with values closer to 1 suggesting clearer separation between classes. LMR p-value = Lo–Mendell–Rubin adjusted likelihood ratio test; BLRT p-value = Bootstrapped likelihood ratio test. Bolded values typically indicate the optimal model based on a balance between fit statistics and parsimony. In this study, the 4-class model was selected as optimal, considering fit statistics (lower AIC, BIC, aBIC), entropy (0.631), and significant LMR and BLRT values.

**T****able 2** Comparison of Sociodemographic Characteristics Across Latent Caregiver Subgroups

| Variables | Class1 | Class2 | Class3 | Class4 | F/**χ²** | P |
| --- | --- | --- | --- | --- | --- | --- |
| Age (standardized) | 60.08±12.63 | 61.99±4.74 | 42.11±3.87 | 57.69±14.10 | 359.97 | <0.001 |
| Gender = Female | 95 (65.1%) | 67 (49.3%) | 68 (42.2%) | 68 (50.0%) | 16.69 | <0.001 |
| Gender = Male | 51 (34.9%) | 69 (50.7%) | 93 (57.8%) | 68 (50.0%) |  |  |
| Education = Primary or below | 59 (40.4%) | 45 (33.1%) | 13 (8.1%) | 22 (16.2%) | 103.64 | <0.001 |
| Education = High school | 67 (45.9%) | 67 (49.3%) | 57 (35.4%) | 52 (38.2%) |  |  |
| Education = College and above | 59 (40.4%) | 45 (33.1%) | 13 (8.1%) | 22 (16.2%) |  |  |
| Employment = Unemployed | 89 (61.0%) | 27 (19.9%) | 16 (9.9%) | 43 (31.6%) | 268.65 | <0.001 |
| Employment = Part-time | 26 (17.8%) | 18 (13.2%) | 33 (20.5%) | 16 (11.8%) |  |  |
| Employment = Retired | 9 (6.2%) | 74 (54.4%) | 7 (4.3%) | 35 (25.7%) |  |  |
| Employment = Full time | 26 (17.8%) | 18 (13.2%) | 33 (20.5%) | 16 (11.8%) |  |  |
| Income = Low | 64 (43.8%) | 50 (36.8%) | 16 (9.9%) | 35 (25.7%) | 65.67 | <0.001 |
| Income = Middle | 49 (33.6%) | 55 (40.4%) | 59 (36.6%) | 57 (41.9%) |  |  |
| Income = High | 33 (22.6%) | 31 (22.8%) | 86 (53.4%) | 44 (32.4%) |  |  |
| Care relationship = Spouse | 18 (12.3%) | 10 (7.4%) | 29 (18.0%) | 19 (14.0%) | 126.08 | <0.001 |
| Care relationship = Others | 34 (23.3%) | 93 (68.4%) | 18 (11.2%) | 34 (25.0%) |  |  |
| Care relationship = Adult child | 94 (64.4%) | 33 (24.3%) | 114 (70.8%) | 83 (61.0%) |  |  |

**Table 3** Multinomial Logistic Regression Predicting Class Membership (Reference = Class 4)

| **Group** | **Variable** | **B** | **SE** | **OR** | **95% CI (OR)** | **p-value** | **Explanation** |
| --- | --- | --- | --- | --- | --- | --- | --- |
| Class 1 |  |  |  |  |  |  |  |
|  | Age (standardized) | 0.15 | 0.14 | 1.16 | [0.87, 1.53] | 0.311 | Per 1 SD increase in age |
|  | Gender = Male | -0.51 | 0.29 | 0.60 | [0.34, 1.06] | 0.080 | vs. Female |
|  | Education = Primary or below | 1.81 | 0.40 | 6.09 | [2.78, 13.36] | <0.001 | vs. College and above |
|  | Education = High school | 1.17 | 0.35 | 3.24 | [1.64, 6.40] | 0.001 | vs. College and above |
|  | Employment = Unemployed | 1.42 | 0.37 | 4.12 | [2.00, 8.50] | <0.001 | vs. Full-time |
|  | Employment = Part-time | 1.27 | 0.47 | 3.54 | [1.35, 8.82] | 0.006 | vs. Full-time |
|  | Employment = Retired | -0.23 | 0.50 | 0.80 | [0.30, 2.13] | 0.650 | vs. Full-time |
|  | Income = Low | 1.28 | 0.37 | 3.61 | [1.56, 7.42] | <0.001 | vs. High |
|  | Income = Middle | 0.81 | 0.36 | 2.25 | [1.10, 4.57] | 0.025 | vs. High |
|  | Care relationship = Spouse | -0.19 | 0.36 | 0.83 | [0.41, 1.68] | 0.605 | vs. Adult child |
|  | Care relationship = Others | 0.27 | 0.44 | 1.31 | [0.55, 3.11] | 0.536 | vs. Adult child |
| Class 2 |  |  |  |  |  |  |  |
|  | Age (standardized) | 0.51 | 0.17 | 1.67 | [1.20, 2.31] | 0.002 | Per 1 SD increase in age |
|  | Gender = Male | -0.06 | 0.33 | 0.94 | [0.50, 1.79] | 0.854 | vs. Female |
|  | Education = Primary or below | 2.61 | 0.48 | 13.58 | [5.26, 35.09] | <0.001 | vs. College and above |
|  | Education = High school | 1.98 | 0.42 | 7.27 | [3.18, 16.60] | <0.001 | vs. College and above |
|  | Employment = Unemployed | 0.40 | 0.49 | 1.49 | [0.57, 3.91] | 0.415 | vs. Full-time |
|  | Employment = Part-time | 1.24 | 0.58 | 3.46 | [1.12, 10.70] | 0.031 | vs. Full-time |
|  | Employment = Retired | 1.81 | 0.45 | 6.09 | [2.54, 14.60] | <0.001 | vs. Full-time |
|  | Income = Low | 1.32 | 0.45 | 3.75 | [1.56, 9.00] | 0.003 | vs. High |
|  | Income = Middle | 1.00 | 0.41 | 2.73 | [1.22, 6.13] | 0.015 | vs. High |
|  | Care relationship = Spouse | 2.37 | 0.38 | 10.69 | [5.12, 22.31] | <0.001 | vs. Adult child |
|  | Care relationship = Others | 0.19 | 0.53 | 1.21 | [0.43, 3.41] | 0.723 | vs. Adult child |
| Class 3 |  |  |  |  |  |  |  |
|  | Age (standardized) | -2.95 | 0.44 | 0.05 | [0.02, 0.12] | <0.001 | Per 1 SD increase in age |
|  | Gender = Male | 0.74 | 0.43 | 2.09 | [0.89, 4.90] | 0.089 | vs. Female |
|  | Education = Primary or below | -2.57 | 0.72 | 0.08 | [0.02, 0.31] | <0.001 | vs. College and above |
|  | Education = High school | -0.84 | 0.44 | 0.43 | [0.18, 1.01] | 0.053 | vs. College and above |
|  | Employment = Unemployed | -2.72 | 0.55 | 0.07 | [0.02, 0.19] | 0.000 | vs. Full-time |
|  | Employment = Part-time | -0.44 | 0.59 | 0.64 | [0.20, 2.03] | 0.453 | vs. Full-time |
|  | Employment = Retired | -3.59 | 0.64 | 0.03 | [0.01, 0.10] | 0.000 | vs. Full-time |
|  | Income = Low | -1.41 | 0.60 | 0.24 | [0.08, 0.79] | 0.018 | vs. High |
|  | Income = Middle | -2.04 | 0.51 | 0.13 | [0.05, 0.36] | <0.000 | vs. High |
|  | Care relationship = Spouse | -1.59 | 0.54 | 0.20 | [0.07, 0.59] | 0.003 | vs. Adult child |
|  | Care relationship = Others | -0.12 | 0.58 | 0.89 | [0.29, 2.74] | 0.835 | vs. Adult child |

**Table 4** Comparison of Key Psychosocial and Caregiving Variables Across Latent Classes

|  | HADS_Depression | CDRISC_Tenacity | MSPSS_Family | CSSE_Behavioral | Care Duration_Months | Daily Care_Hours |
| --- | --- | --- | --- | --- | --- | --- |
| Class1 | 9.93±3.44 | 12.06±2.67 | 13.57±4.05 | 27.73±4.96 | 9.81±5.39 | 5.02±2.16 |
| Class2 | 8.79±3.73 | 10.54±2.89 | 19.92±3.01 | 30.81±5.04 | 10.94±5.09 | 5.07±1.70 |
| Class3 | 5.65±2.52 | 14.37±3.21 | 18.30±3.25 | 38.34±5.26 | 12.38±4.37 | 5.34±1.47 |
| Class4 | 7.38±3.70 | 14.42±3.34 | 17.28±3.65 | 33.15±4.51 | 25.45±5.20 | 6.04±1.92 |
| H | 119.148 | 131.482 | 160.866 | 229.791 | 300.46 | 22.369 |
| *p* | <.001 | <.001 | <.001 | <.001 | <.001 | <.001 |

Note: Values are presented as Mean ± SD. P-values from Kruskal–Wallis tests.
